# Supplementary material for: A novel function of the key nitrogen-fixation activator NifA in beta-rhizobia: Repression of bacterial auxin synthesis during symbiosis
Source: Front Plant Sci. 2022 Sep 28;13:991548. doi: 10.3389/fpls.2022.991548 (PMC9554594; doi:10.3389/fpls.2022.991548)
Supplement: Supplementary file 2 [file Table_1.XLSX]

## Sheet: Supplementary Table 1
Supplementary Table 1: Strains, plasmids and primers used
Strains or plasmids	Description	Reference
Strains
Escherichia coli
cc118λ-pir	Δ(ara-leu) araD ΔlacX74 galE galK phoA20 thi1 rpsE rpoB argE(Am) recAl λ pir; StrepR	Herrero et al 1990
Top10	ΔlacX74 araΔ139Δ(ara-leu)	Invitrogen
Paraburkholderia phymatum
STM815	wild-type	Moulin et al 2001
nifA	nifA::pSHAFT2 mutant of STM815; CmR	Lardi et al 2017
nifA+pBBR-nifA	nifA mutant harboring pBBR1MCS‐2‐nifA experssed by lacZ artificial promoter; KmR and CmR	Bellés-Sancho et al 2021
∆iaaMH	Bphy_7769-Bphy_7768 deletion mutant of STM815; TmR	This study
∆iaaMH+pBBR-iaaMH (placZ)	∆iaaMH mutant harboring pBBR1MCS-2-iaaMH experssed by lacZ artificial promoter; TmR and KmR	This study
∆iaaMH+pBBR-iaaMH	∆iaaMH mutant harboring pBBR1MCS-2-iaaMH expressed by iaaMH natural promoter; TmR and KmR	This study
nifA-∆iaaMH	nifA and ∆iaaMH double mutant of STM815; CmR and TmR	This study
nifA-∆iaaMH+pBBR-iaaMH (placZ)	nifA-∆iaaMH mutant harboring pBBR1MCS-2-iaaMH experssed by lacZ artificial promoter; CmR, TmR and KmR	This study
nifA-∆iaaMH+pBBR-iaaMH	nifA-∆iaaMH mutant harboring pBBR1MCS-2-iaaMH expressed by iaaMH natural promoter; CmR, TmR and KmR	This study
WT-pPROBE	STM815 harbouring pPROBE-NT empty vector, KmR	Liu et al 2020
WT-pPROBE::pnodB	STM815 harbouring pPROBE-NT with nodB (Bphy_7722) promotor; KmR	Hug et al 2021
WT-pPROBE::piaaMH	STM815 harbouring pPROBE-NT with iaaMH (Bphy_7769) promotor; KmR	This study
nifA-IM+pPROBE::piaaMH	nifA harbouring pPROBE-NT with iaaMH (Bphy_7769) promotor; KmR	This study
Plasmids
pPROBE-NT	Broad host-range promotor vector; KmR	Miller et al 2000
pPROBE::piaaMH	pPROBE-NT containing iaaMH promotor in front of gfp; KmR	This study
pBBR1MCS2	Broad host-range cloning vector; KmR	Kovach et al 1995
pBBR1MCS2::iaaMH_pLacZ	pBBR1MCS-2 containing iaaMH experssed by lacZ artificial promoter for complementation; KmR	This study
pBBR1MCS2::iaaMH	pBBR1MCS-2 containing iaaMH experssed by its natural promoter for complementation; KmR	This study
p34E-TpTer	p34E containing dfrB2 gene fused to rrnB, T1T2 terminators; AmpR and TmR	Shastri et al 2017
pSHAFT2	Broad host-range suicide plasmid; CmR	Shastri et al 2017
pSHAFT2::∆iaaMH	pSHAFT2 containing a 529 bp upstream fragment and a 525 bp downstream fragment of iaaMH for mutagenesis; Tm cassette in between the sequences; CmR and TmR	This study
pSHAFT2::nifA	pSHAFT2 containing a 414 bp internal fragment of Bphy_7728 for mutagenesis; CmR	Lardi et al 2017
pRK2013	Helper plasmid; KmR	Figurski et al 1979
Primers	Sequence1	Source
Bphy7769_up_F_EcoRI	GCGCgaattcTATCGCAGACAAGGGCTATG	This study
Bphy7769_up_R_NdeI	GCGCcatatgGTCAACAGTCGGTGATGAAC	This study
Bphy7768_dn_F_XhoI	CGCGctcgagTCGTAATAGTGGGCTACCGT	This study
Bphy7768_dn_R_EcoRI	GCGCgaattcAGCATCAGCGGTAAAGCAAG	This study
Bphy7770_veri_F	CATTCAGCCGGAGCTACAAA	This study
Bphy7767_veri_R	AGCATGGCCTTCACCATATC	This study
Bphy7769_comp_F_XbaI	GCGCtctagaACATTCGCCGTACCTTCAAC	This study
Bphy7768_comp_R_XbaI	GCGCtctagaACGGTAGCCCACTATTACGA	This study
Bphy7768_seq_R	GCATCTTTCGCTGTCTTCGT	This study
Bphy_7769p_EcoRI_F	GCGCgaattcGGATTGTCTCCGTTATGACA	This study
Bphy_7769p_SalI_R	GCGCgtcgacTATCAATATTATTTGTTTGAT	This study
LacZ_R	TGCTGCAAGGCGATTAAG	This study
1Restrictions sites are in lower letters
References
Herrero et al. J Bacteriol 1990, 172, 6557–6567.
Moulin et al. Nature 2001, 411, 948–950, doi:10.1038/35082070.
Lardi et al. Genes 2017, 8, 389, doi:10.3390/ genes8120389
Bellés-Sancho et al. Metabolites 2021 11, 455; doi.org/10.3390/metabo11070455
Liu et al. Front Microbiol 2020 11, 1600, doi: 10.3389/fmicb.2020.01600
Hug et al. Front Microbiol 2021 12, 1493, doi: 10.3389/fpls.2021.699590
Miller et al. Mol Plant Microbe Interact 2000, 13, 1243-1250.
Kovach et al. Gene 1995, 166, 175–176, doi:10.1016/0378-1119(95)00584-1.
Shastri et al. Plasmid 2017, 89, 49–56, doi:10.1016/j.plasmid.2016.11.002.
Figurski and Helsinki. Proc Natl Acad Sci U S A 1979, 76, 1648-1652
